# Supplementary material
Source: Royal Society of Chemistry journal article supplement (doi:10.1039/d6ta01437b)
Supplement: d6ta01437b1.pdf [file d6ta01437b1.pdf]

## Supplementary Information

### Chemical Pre-regulation of 2D Perovskite Nucleation Enables Phase-Homogeneous 2D/3D Perovskite Interfaces

*Bin Wu<sup>a,b</sup>, Di Shen<sup>a</sup>, Jiaxue Zhai<sup>a,b</sup>, Jiayan Chen<sup>a,b</sup>, YongHua<sup>a,b</sup>, Chong Wang<sup>a,b</sup>, Shafidah Shafian<sup>c,\*</sup>, Lin Xie<sup>a,b,\*</sup>*

- a. School of Materials and Energy, Yunnan University, Kunming, 650091, China
- b. International Joint Research Center for Optoelectronic and Energy Materials, Yunnan University, Kunming, 650091, China
- c. Solar Energy Research Institute, Universiti Kebangsaan Malaysia, Bangi, Selangor, 43600, Malaysia

\*Corresponding Author e-mail: [lxie@ynu.edu.cn](mailto:lxie@ynu.edu.cn), [norshafidah@ukm.edu.my](mailto:norshafidah@ukm.edu.my)



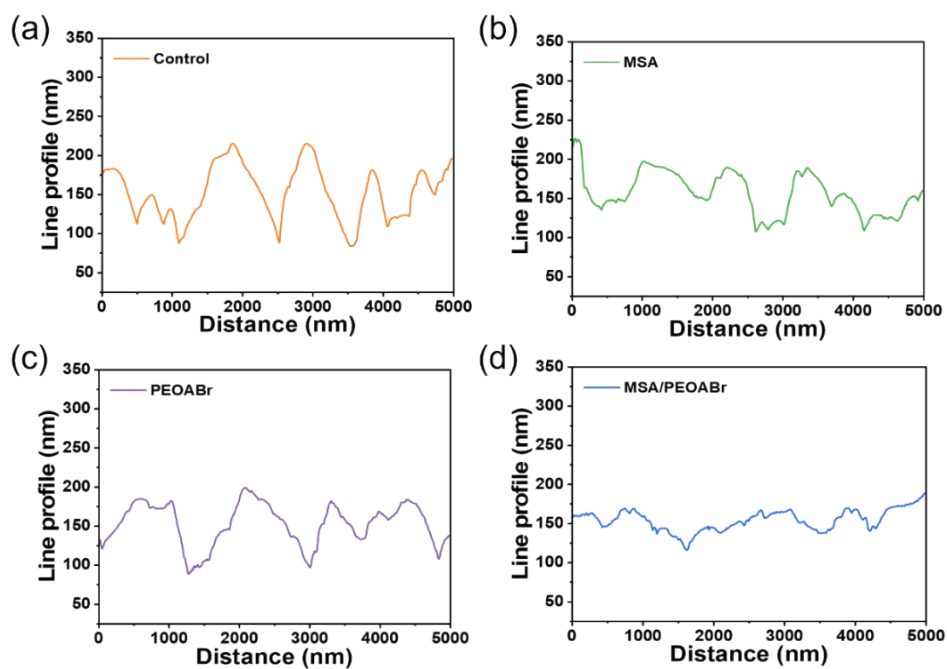

**Figure S3.** (a-d) Line profiles corresponding to the AFM images in Figure 1 (g-j).

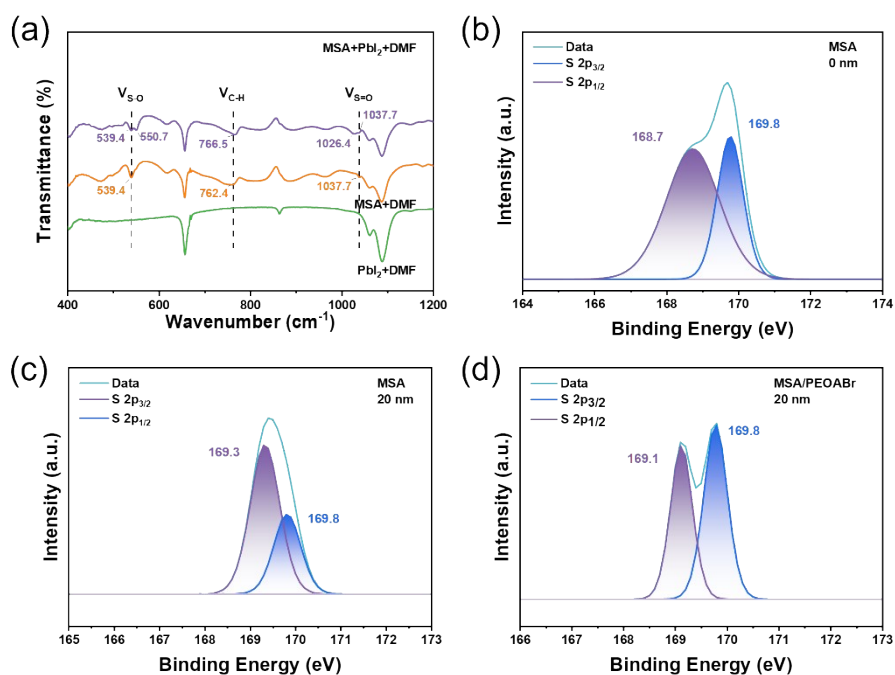

**Figure S4.** (a) FTIR spectra of  $\text{PbI}_2$ +DMF, MSA+DMF, and MSA+ $\text{PbI}_2$ +DMF. (b-d) High-resolution S 2p XPS spectra with peak fitting for MSA (0 nm), MSA (20 nm), and MSA/PEOABr (20 nm), respectively.

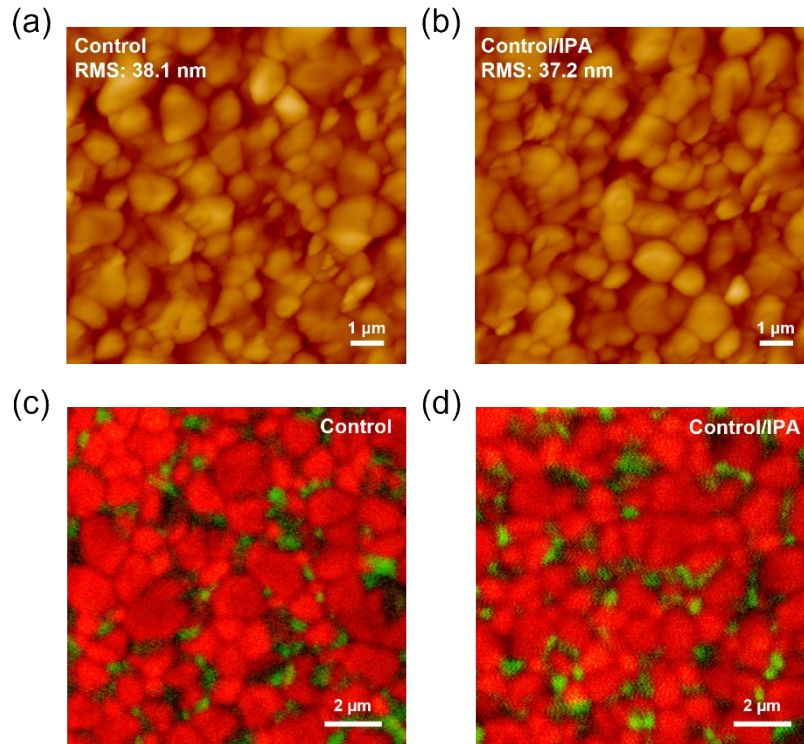

**Figure S5.** (a,b) AFM topography images of the Control and Control/IPA perovskite films. (c,d) CLSM mapping images of the Control and Control/IPA films.

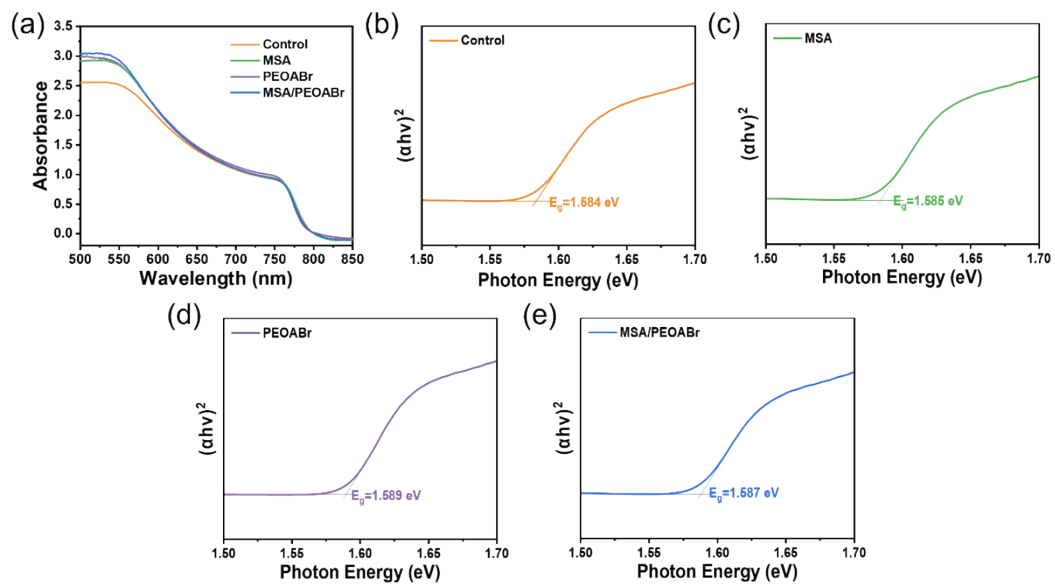

**Figure S6.** (a) The UV-vis spectra of perovskite films prepared with interface treatment using MSA, PEOABr, the combined MSA/PEOABr, and without any treatment. (b-e) Tauc plots for optical bandgap fitting.

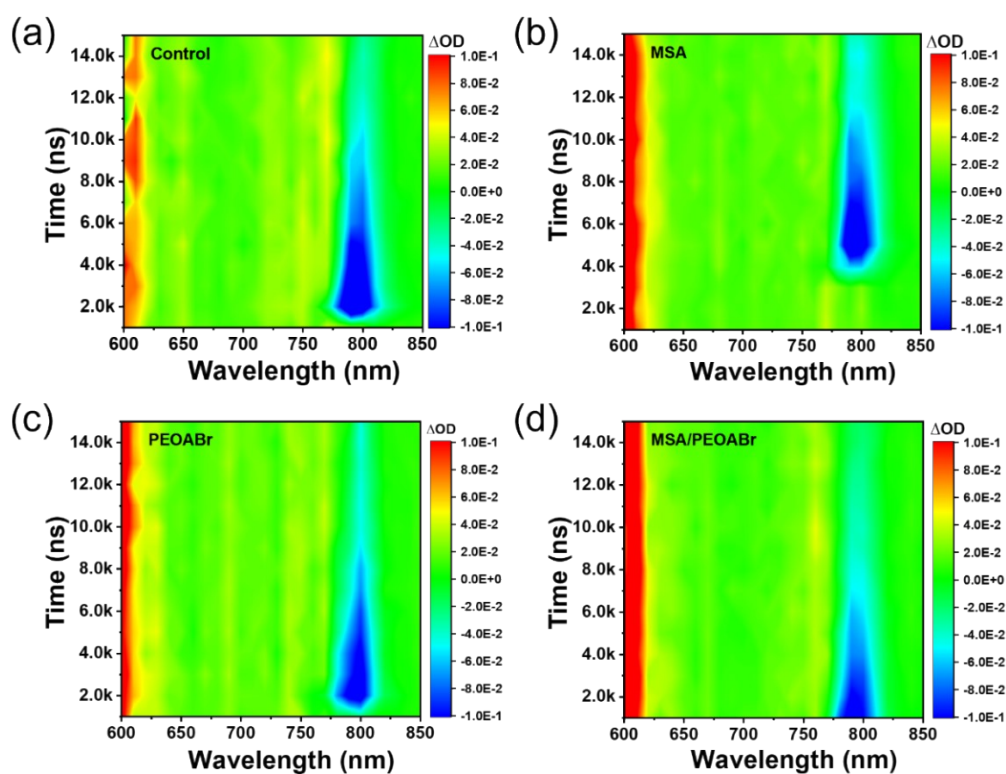

**Figure S7.** Two-dimensional color diagram corresponding to ns-TAS of the perovskite films: a) control; b) MSA; c) PEOABr; d) MSA/PEOABr.

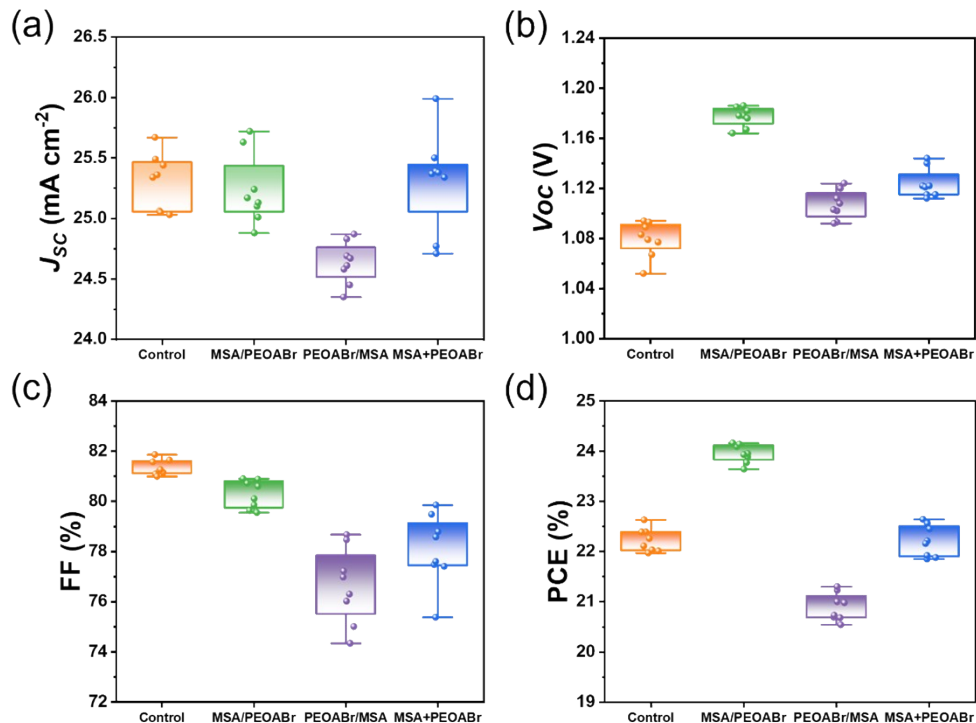

**Figure S8.** Statistical distributions of photovoltaic parameters, including (a)  $J_{sc}$ , (b)  $V_{oc}$ , (c) FF and (d) PCE, for devices fabricated by sequential coating (MSA/PEOABr and PEOABr/MSA) and one-step mixed-solution coating (MSA + PEOABr) at different concentrations.

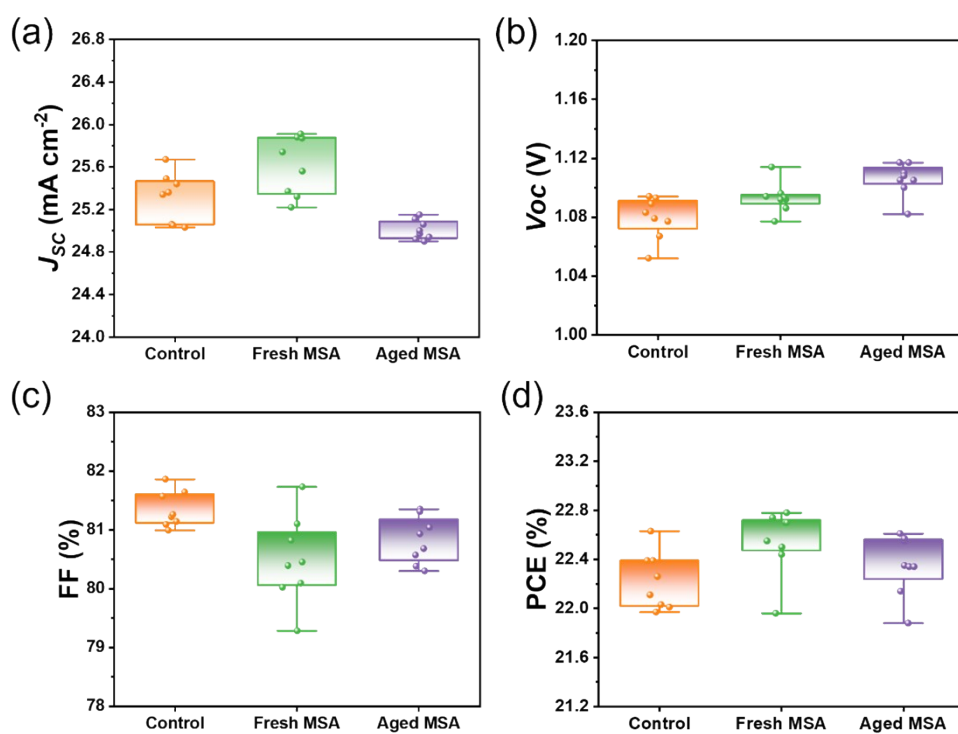

**Figure S9.** Statistical distributions of the photovoltaic parameters for the Control, Fresh MSA, and Aged MSA devices, including (a)  $J_{sc}$ , (b)  $V_{oc}$ , (c) FF and (d) PCE.

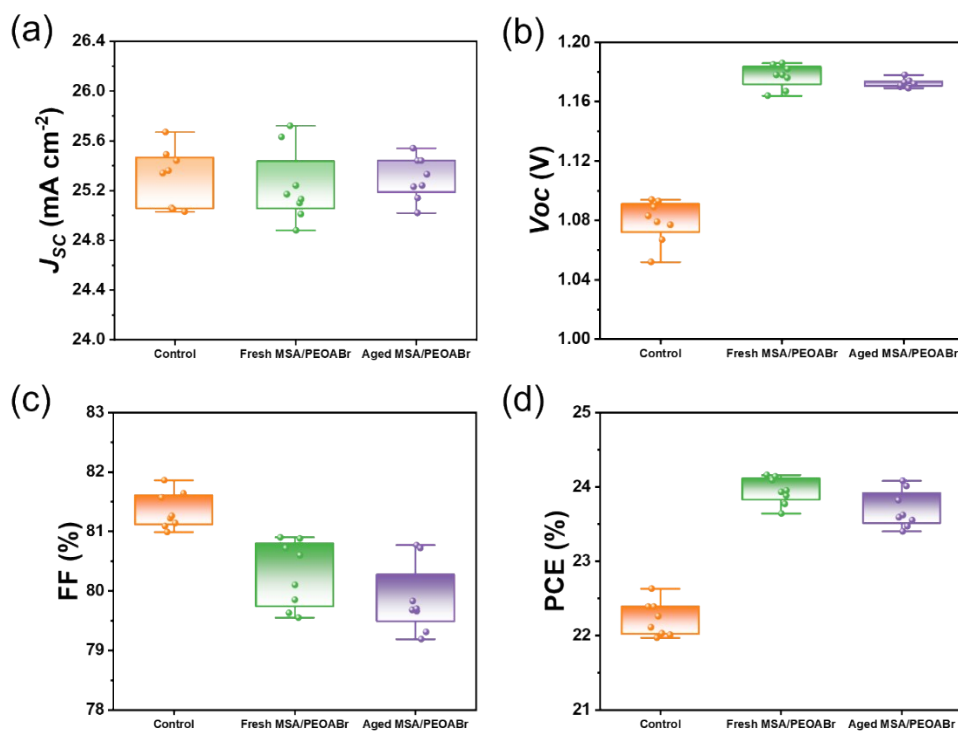

**Figure S10.** Statistical distributions of the photovoltaic parameters for the Control, Fresh MSA/PEOABr, and Aged MSA/PEOABr devices, including (a)  $J_{sc}$ , (b)  $V_{oc}$ , (c) FF and (d) PCE.

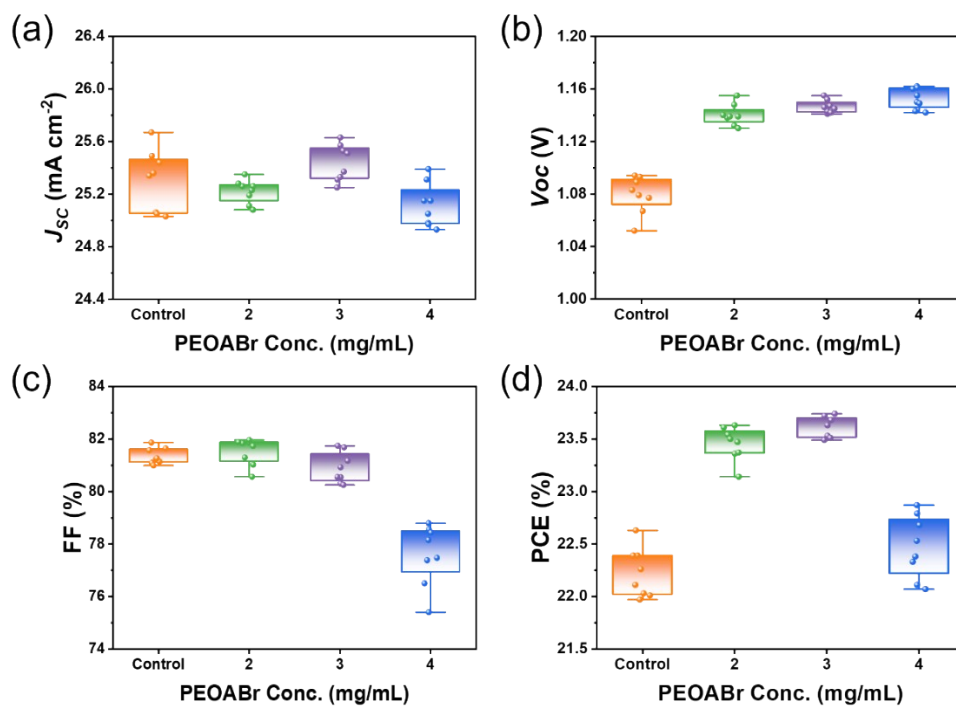

**Figure S11.** Statistical distributions of the photovoltaic parameters (a)  $J_{SC}$ , (b)  $V_{OC}$ , (c) FF and (d) PCE, which were quantified at an MSA concentration of 0.5 mg/mL, and the changes in the concentration of PEOABr scaffold device.

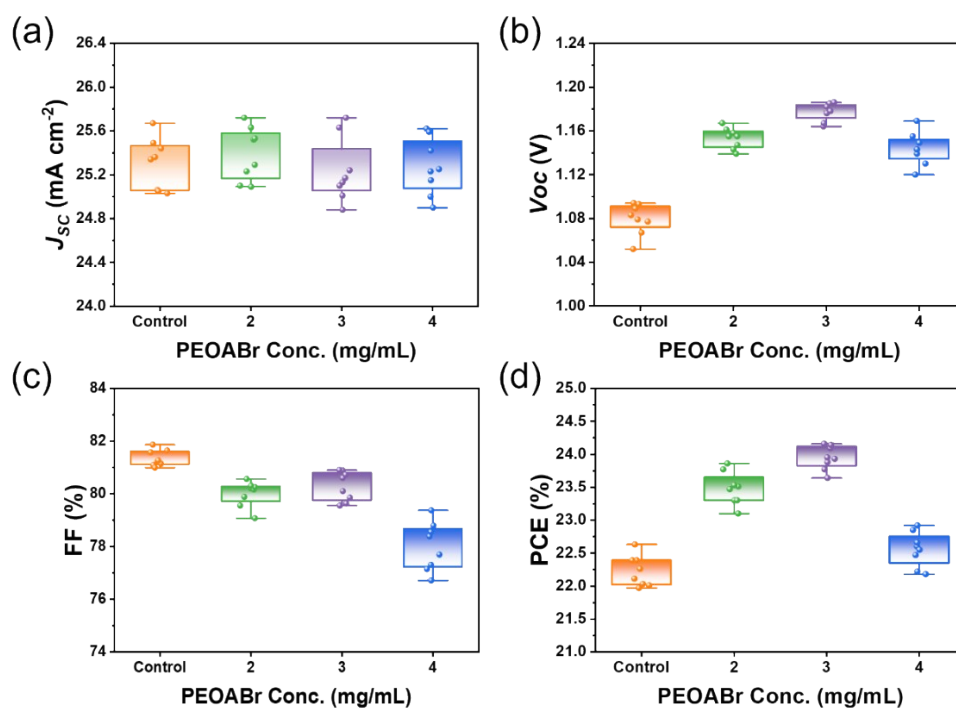

**Figure S12.** Statistical distributions of the photovoltaic parameters (a)  $J_{SC}$ , (b)  $V_{OC}$ , (c) FF and (d) PCE, which were quantified at an MSA concentration of 1.0 mg/mL, and the changes in the concentration of PEOABr scaffold device.

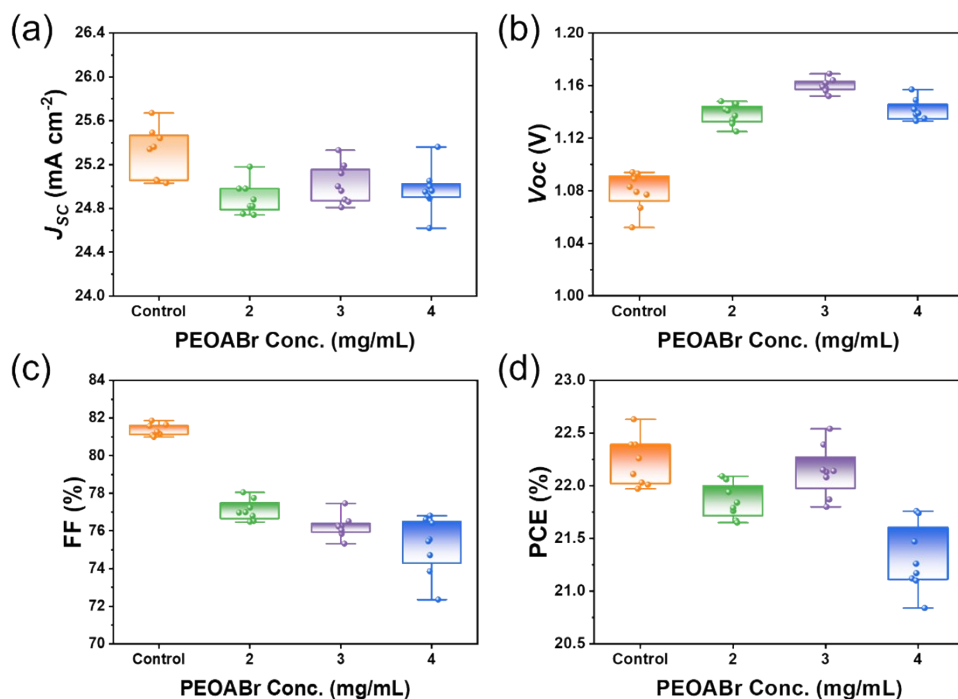

**Figure S13.** Statistical distributions of the photovoltaic parameters (a)  $J_{SC}$ , (b)  $V_{OC}$ , (c) FF and (d) PCE, which were quantified at an MSA concentration of 1.5 mg/mL, and the changes in the concentration of PEOABr scaffold device.

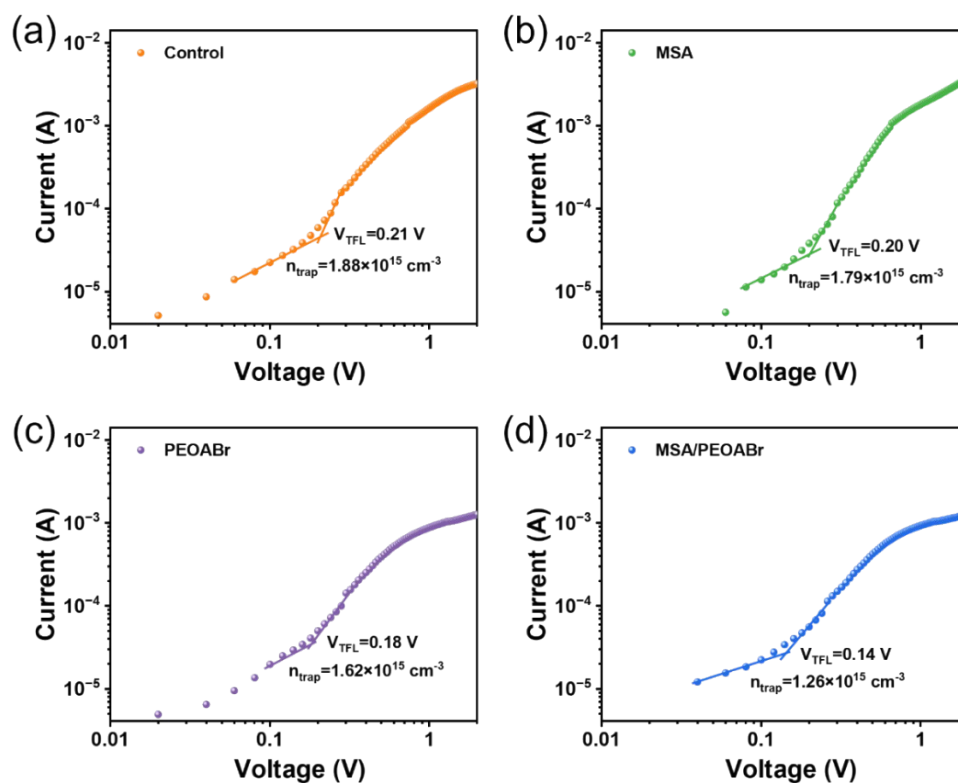

**Figure S14.** a-d) Dark  $J-V$  characteristics of hole-only devices with the structure ITO/PEDOT:PSS/perovskite (with and without interface treatment using MSA, PEOABr, and MSA/PEOABr/Spiro /Ag.

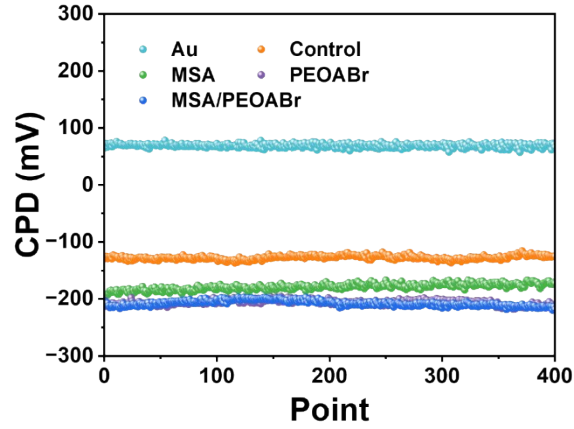

**Figure S15.** Contact potential difference (CPD) measurements of perovskite films with and without interface treatment using MSA, PEOABr, and MSA/PEOABr.

**Table S1.** Fitted results of TRPL decay curves.

| Sample     | $A_1$ (%) | $A_2$ (%) | $\tau_1$ (ns) | $\tau_2$ (ns) | $\tau_{ave}$ (ns) |
|------------|-----------|-----------|---------------|---------------|-------------------|
| Control    | 43.0      | 57.0      | 111.01        | 514.77        | 459               |
| MSA        | 43.0      | 57.0      | 341.95        | 819.16        | 705.71            |
| PEOABr     | 3.0       | 97.0      | 178.92        | 721.36        | 716.79            |
| MSA/PEOABr | 41.0      | 59.0      | 557.87        | 1350.25       | 1171.26           |

**Table S2.** Fitted results of TRPL decay curves with Spiro-OMeTAD.

| Sample/Spiro | $A_1$ (%) | $A_2$ (%) | $\tau_1$ (ns) | $\tau_2$ (ns) | $\tau_{ave}$ (ns) |
|--------------|-----------|-----------|---------------|---------------|-------------------|
| Control      | 43.0      | 57.0      | 1.67          | 229.41        | 228.14            |
| MSA          | 44.0      | 56.0      | 8.79          | 161.09        | 154.64            |
| PEOABr       | 52.0      | 48.0      | 7.23          | 72.97         | 66.47             |
| MSA/PEOABr   | 35.0      | 65.0      | 6.08          | 57.66         | 49.17             |

**Table S3.** Photogenerated resistance parameters extracted from impedance spectra fitting.

| Sample     | $R_{ct}$ (K $\Omega$ ) | $R_{rec}$ (K $\Omega$ ) |
|------------|------------------------|-------------------------|
| Control    | 12.5                   | 110                     |
| MSA        | 10.5                   | 110                     |
| PEOABr     | 9.56                   | 166                     |
| MSA/PEOABr | 8.81                   | 201                     |

**Table S4.** Fitted results of ns-TAS decay curves.

| Sample     | $A_1$ (%) | $\tau_1$ (ns) | $A_2$ (%) | $\tau_2$ (ns) | $\tau_{rec}$ (ns) |
|------------|-----------|---------------|-----------|---------------|-------------------|
| Control    | 51.43     | 1176.98       | 48.57     | 3085.73       | 2536.59           |
| MSA        | 51.19     | 1068.82       | 48.81     | 3648.71       | 3042.33           |
| PEOABr     | 57.85     | 1164.85       | 42.15     | 4371.39       | 3512.68           |
| MSA/PEOABr | 65.92     | 1300.49       | 34.08     | 7197.59       | 5670.11           |

**Table S5.** Presents the work function (WF) values calculated from the measured CPD data.

|                   | Au  | Control | MSA  | PEOABr | MSA/PEOABr |
|-------------------|-----|---------|------|--------|------------|
| $\Phi_{ave}$ (mV) | 70  | -130    | -180 | -200   | -210       |
| WF (eV)           | 5.1 | 4.9     | 4.85 | 4.83   | 4.82       |
